# Supplementary material for: Modulating Innate Immunity Improves Hepatitis C Virus Infection and Replication in Stem Cell-Derived Hepatocytes
Source: PubMed Central journal article supplement — Stem Cell Reports. 2014 May 29;3(1):204–14. doi: 10.1016/j.stemcr.2014.04.018 (PMC4110790; doi:10.1016/j.stemcr.2014.04.018), 2014-05-29
Supplement: mmc1.pdf [file mmc1.pdf]

**Stem Cell Reports, Volume 3**

**Supplemental Information**

**Modulating Innate Immunity Improves**

**Hepatitis C Virus Infection and Replication**

**in Stem Cell-Derived Hepatocytes**

**Xiaoling Zhou, Pingnan Sun, Baltasar Lucendo-Villarin, Allan G.N. Angus, Dagmara Szkolnicka,  
Kate Cameron, Sarah L. Farnworth, Arvind H. Patel, and David C. Hay**

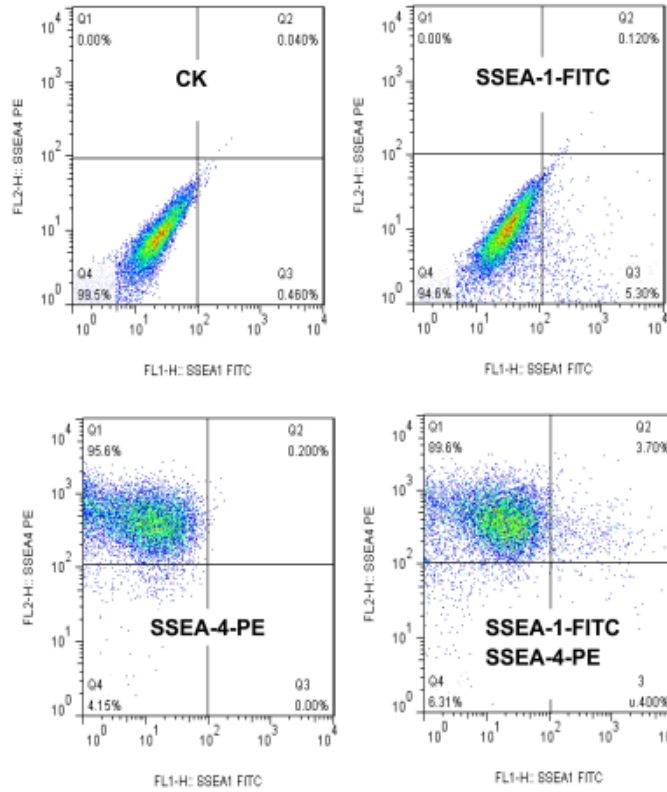

**Figure S1. hESC characterization, Related to Figure 1**

hESCs were maintained feeder-free prior to hepatic differentiation. hESCs cell surface expression was determined by flow cytometry. hESCs were labeled with control (CK), SSEA-1 and SSEA-4 antibodies and percentage positive cells were measured.

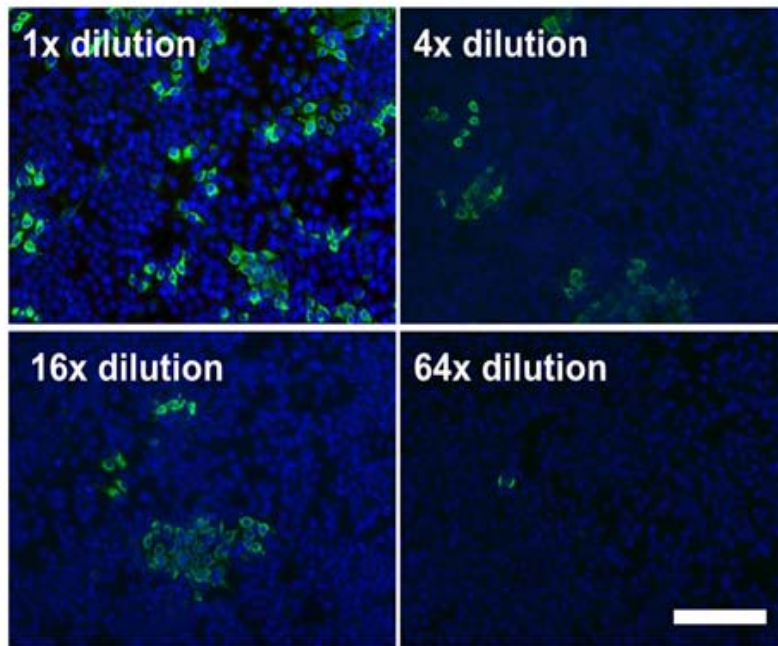

**Figure S2. Focus forming assay of HCV-containing supernatant from hESC-Heps, Related to Figure 3**

Supernatants were collected from hESC-Heps 5 days post-infection. Naive Huh7 cells seeded in 96 well plates were infected with 100  $\mu$ l of serially diluted supernatants collected from infected hESC-Heps. Following incubation at 37°C for 3 d, the infected Huh7 cells were fixed with methanol and stained for the viral NS5A protein (green) and counterstained by DAPI (blue). Scale bar = 100  $\mu$ m

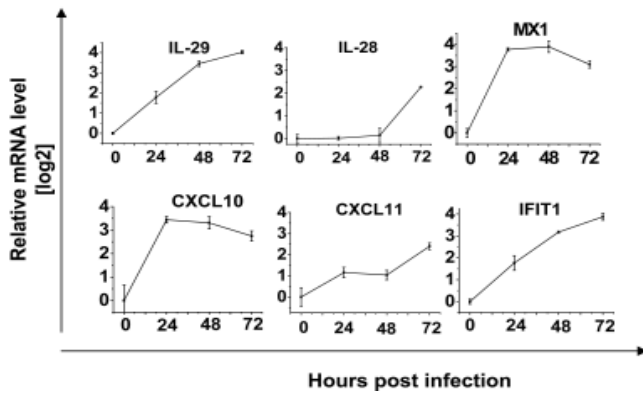

**Figure S3. ISG gene expression in response to HCV infection**

RNA was extracted from hESC-Heps at 0, 24, 48 or 72 h post-infection, and the mRNA levels of IFN (*IL-29*, *IL-28*) and ISGs (*MX1*, *CXCL10*, *CXCL11*, *IFIT1*) were determined by QPCR. n=3 biological replicates.

|                      | <i>Type</i> | <i>Source</i>    | <i>Dilution for Western blot</i> | <b>Dilution for Immunostaining</b> |
|----------------------|-------------|------------------|----------------------------------|------------------------------------|
| Primary antibodies   |             |                  |                                  |                                    |
| Oct4                 | Rb poly     | Abcam            | 1/2000                           | 1/500                              |
| Albumin              | Mo mono     | Sigma            |                                  | 1/500                              |
| HNF4 $\alpha$        | Rb poly     | Santa Cruz       |                                  | 1/100                              |
| E-cadherin           | Mo mono     | Abcam            |                                  | 1/50                               |
| AFP                  | Mo mono     | Sigma            | 1/2000                           |                                    |
| $\beta$ -Actin       | Mo mono     | Sigma            | 1/10000                          |                                    |
| Occludin             | Mo mono     | Invitrogen       | 1/1000                           | 1/200                              |
| CD81                 | Mo mono     | Santa Cruz       | 1/200                            | 1/50                               |
| SR-BI                | Mo mono     | BD               | 1/1500                           | 1/200                              |
| Claudin-1            | Mo mono     | Invitrogen       | 1/1000                           | 1/200                              |
| Secondary antibodies |             |                  |                                  |                                    |
| Anti Ra HRP          | Go anti-Rb  | DAKO             | 1/5000                           |                                    |
| Anti Mo HRP          | Go anti-Mo  | DAKO             | 1/5000                           |                                    |
| Anti-Mo 488          | DN anti-Mo  | Molecular Probes |                                  | 1/500                              |
| Anti-Ra 488          | DN anti-Mo  | Molecular Probes |                                  | 1/500                              |
| Anti-Ra 594          | DN anti-Ra  | Molecular Probes |                                  | 1/500                              |

**Table S1. Antibodies used in this study, Related to Figures 1–5**

| <i>Gene name</i> | <i>Sequence (5' →3')</i> | <b>Direction</b> |
|------------------|--------------------------|------------------|
| <i>CD81</i>      | TCTTCAAGGAGGACTGCCACC    | Forward          |
|                  | ATGATCACAGCGACCACGATG    | Reverse          |
| <i>CLDN1</i>     | CCTCCTGGGAGTGATAGCAAT    | Forward          |
|                  | GGCAACTAAAATAGCCAGACCT   | Reverse          |
| <i>SRBI</i>      | TGGGAAGATTGAGCCTGTGGT    | Forward          |
|                  | AGGACGTACTGGGCATAGTGC    | Reverse          |
| <i>OCN</i>       | TTCCAATGGCAAAGTGAATGAC   | Forward          |
|                  | CAAAGTTACCACCGCTGCTGTA   | Reverse          |
| <i>IL-29</i>     | GGCAGGTTCAAATCTCTGTCAC   | Forward          |
|                  | CTGCCACTCCAGTTTTTCAGCT   | Reverse          |
| <i>IL-28</i>     | CTGCCACATAGCCCAGTTCA     | Forward          |
|                  | CAGTCCTTCAGCAGAAGCGA     | Reverse          |
| <i>IFIT1</i>     | AGAAGCAGGCAATCACAGAAAA   | Forward          |
|                  | CTGAAACCGACCATAGTGGAAAT  | Reverse          |
| <i>MX1</i>       | TCCGACACGAGTTCCACAAAT    | Forward          |
|                  | AAAGCCTGGCAGCTCTCTACC    | Reverse          |
| <i>ISG15</i>     | CGCAGATCACCCAGAAGATCG    | Forward          |
|                  | TTCGTTCGATTTGTCCACCA     | Reverse          |
| <i>CXCL10</i>    | CTGATTTGCTGCCTTATCTTTCT  | Forward          |
|                  | ATGCAGGTACAGCGTACAGTTCT  | Reverse          |
| <i>CXCL11</i>    | GCCTTGCTGTGATATTGTGTG    | Forward          |
|                  | TGCCACTTTCAGTCTTTTACC    | Reverse          |
| <i>IRF9</i>      | GCTCTTCAGAACCGCCTACTT    | Forward          |
|                  | GGCTCTCTCCCAGAAATTC      | Reverse          |
| <i>RIG-1</i>     | AGTTGCTGATGAAGGCATTGAC   | Forward          |
|                  | GCACTTGCTACCTCTTGCTCTT   | Reverse          |
| <i>HCV</i>       | TCTGCGGAACCGGTGAGTAC     | Forward          |
|                  | GCACTCGCAAGCGCCCTATC     | Reverse          |
| <i>GAPDH</i>     | CACCATCTTCCAGGAGCGA      | Forward          |
|                  | TCAGCAGAGGGGCAGAGA       | Reverse          |

**Table S2. Primer sequences used in this study, Related to Figures 2–5**

| <i>Position</i> | <i>Unigene</i> | <i>GeneBank</i> | <i>Symbol</i> | <i>Fold change (IL29 test)</i> | <i>Fold change (HCV test)</i> |
|-----------------|----------------|-----------------|---------------|--------------------------------|-------------------------------|
| A01             | Hs.12341       | NM_001111       | <i>ADAR</i>   | 4.81                           | 1.62                          |
| A02             | Hs.129966      | NM_001842       | <i>CNTFR</i>  | 3.69                           | 4.48                          |
| A03             | Hs.287729      | NM_001012288    | <i>CRLF2</i>  | 2.13                           | 8.25                          |
| A04             | Hs.520937      | NM_006140       | <i>CSF2RA</i> | 1.36                           | 3.57                          |
| A05             | Hs.524517      | NM_000760       | <i>CSF3R</i>  | 1.1                            | 3.71                          |
| A06             | Hs.632586      | NM_001565       | <i>CXCL10</i> | 110.63                         | 4.32                          |
| A07             | Hs.501452      | NM_005755       | <i>EBI3</i>   | 1.99                           | 4.16                          |
| A08             | Hs.62192       | NM_001993       | <i>F3</i>     | 6.9                            | 1.16                          |
| A09             | Hs.380250      | NM_005531       | <i>IFI16</i>  | 4.34                           | 18.39                         |
| A10             | Hs.532634      | NM_005532       | <i>IFI27</i>  | 927.55                         | 5.91                          |
| A11             | Hs.14623       | NM_006332       | <i>IFI30</i>  | 4.05                           | 6.37                          |
| A12             | Hs.632258      | NM_005533       | <i>IFI35</i>  | 11.27                          | 5.65                          |
| B01             | Hs.82316       | NM_006417       | <i>IFI44</i>  | 389.86                         | 6.64                          |
| B02             | Hs.389724      | NM_006820       | <i>IFI44L</i> | 216.25                         | 2.54                          |
| B03             | Hs.730125      | NM_002038       | <i>IFI6</i>   | 111.52                         | 5.12                          |
| B04             | Hs.163173      | NM_022168       | <i>IFIH1</i>  | 51.89                          | 4.19                          |
| B05             | Hs.20315       | NM_001548       | <i>IFIT1</i>  | 2488.73                        | 4.64                          |
| B06             | Hs.437609      | NM_001547       | <i>IFIT2</i>  | 152.75                         | 3.41                          |
| B07             | Hs.714337      | NM_001549       | <i>IFIT3</i>  | 9.69                           | 2.1                           |
| B08             | Hs.458414      | NM_003641       | <i>IFITM1</i> | 20.27                          | 6.29                          |
| B09             | Hs.709321      | NM_006435       | <i>IFITM2</i> | 0.85                           | 4.6                           |
| B10             | Hs.37026       | NM_024013       | <i>IFNA1</i>  | 0.82                           | 6.04                          |
| B11             | Hs.93907       | NM_002172       | <i>IFNA14</i> | N/A                            | 5.41                          |
| B12             | Hs.56303       | NM_002173       | <i>IFNA16</i> | N/A                            | 3.47                          |
| C01             | Hs.211575      | NM_000605       | <i>IFNA2</i>  | N/A                            | 3.68                          |
| C02             | Hs.113211      | NM_002175       | <i>IFNA21</i> | N/A                            | 7.45                          |
| C03             | Hs.1510        | NM_021068       | <i>IFNA4</i>  | N/A                            | 2.28                          |
| C04             | Hs.37113       | NM_002169       | <i>IFNA5</i>  | N/A                            | 7.91                          |
| C05             | Hs.533470      | NM_021002       | <i>IFNA6</i>  | N/A                            | 7.66                          |
| C06             | Hs.282274      | NM_021057       | <i>IFNA7</i>  | N/A                            | 5.85                          |
| C07             | Hs.73890       | NM_002170       | <i>IFNA8</i>  | 16.9                           | 6.49                          |
| C08             | Hs.529400      | NM_000629       | <i>IFNAR1</i> | 1.24                           | 4.33                          |
| C09             | Hs.708195      | NM_000874       | <i>IFNAR2</i> | 0.36                           | 4.88                          |
| C10             | Hs.93177       | NM_002176       | <i>IFNB1</i>  | N/A                            | 7.99                          |
| C11             | Hs.682604      | NM_176891       | <i>IFNE</i>   | 0.65                           | 8.25                          |
| C12             | Hs.856         | NM_000619       | <i>IFNG</i>   | N/A                            | 7.77                          |
| D01             | Hs.520414      | NM_000416       | <i>IFNGR1</i> | 2.65                           | 4.89                          |
| D02             | Hs.634632      | NM_005534       | <i>IFNGR2</i> | 1.14                           | 4.21                          |
| D03             | Hs.591083      | NM_020124       | <i>IFNK</i>   | 0.47                           | 8                             |
| D04             | Hs.73010       | NM_002177       | <i>IFNW1</i>  | N/A                            | 6.31                          |
| D05             | Hs.7879        | NM_001550       | <i>IFRD1</i>  | 0.44                           | 4.14                          |
| D06             | Hs.315177      | NM_006764       | <i>IFRD2</i>  | 1.62                           | 7.56                          |
| D07             | Hs.504035      | NM_001558       | <i>IL10RA</i> | 2.25                           | 5.6                           |
| D08             | Hs.654593      | NM_000628       | <i>IL10RB</i> | 0.76                           | 4.28                          |
| D09             | Hs.591088      | NM_004512       | <i>IL11RA</i> | 1.04                           | 5.37                          |
| D10             | Hs.674         | NM_002187       | <i>IL12B</i>  | N/A                            | 4.38                          |

|     |           |              |                |       |       |
|-----|-----------|--------------|----------------|-------|-------|
| D11 | Hs.496646 | NM_001560    | <i>IL13RA1</i> | 0.58  | 4.28  |
| D12 | Hs.654378 | NM_000585    | <i>IL15</i>    | 2.29  | 5.5   |
| E01 | Hs.445868 | NM_014432    | <i>IL20RA</i>  | 5.54  | 9.52  |
| E02 | Hs.61232  | NM_144717    | <i>IL20RB</i>  | 2.29  | 4.52  |
| E03 | Hs.210546 | NM_021798    | <i>IL21R</i>   | 2.46  | 6.69  |
| E04 | Hs.126891 | NM_052962    | <i>IL22RA2</i> | 1.06  | 4.71  |
| E05 | Hs.567792 | NM_172138    | <i>IL28A</i>   | N/A   | 5.47  |
| E06 | Hs.221375 | NM_173065    | <i>IL28RA</i>  | 1.96  | 3.37  |
| E07 | Hs.406745 | NM_172140    | <i>IL29</i>    | 10.99 | 7.1   |
| E08 | Hs.474787 | NM_000878    | <i>IL2RB</i>   | 0.97  | 5.32  |
| E09 | Hs.84     | NM_000206    | <i>IL2RG</i>   | 1.17  | 1.37  |
| E10 | Hs.55378  | NM_139017    | <i>IL31RA</i>  | 0.37  | 5.52  |
| E11 | Hs.632790 | NM_002183    | <i>IL3RA</i>   | 0.62  | 5.88  |
| E12 | Hs.513457 | NM_000418    | <i>IL4R</i>    | 1.64  | 7     |
| F01 | Hs.68876  | NM_000564    | <i>IL5RA</i>   | 3.39  | 7.17  |
| F02 | Hs.654458 | NM_000600    | <i>IL6</i>     | 0.26  | 6.88  |
| F03 | Hs.709210 | NM_000565    | <i>IL6R</i>    | 1.25  | 3.92  |
| F04 | Hs.591742 | NM_002185    | <i>IL7R</i>    | 1.44  | 8.5   |
| F05 | Hs.406228 | NM_002186    | <i>IL9R</i>    | N/A   | 5.67  |
| F06 | Hs.436061 | NM_002198    | <i>IRF1</i>    | 2.26  | 7.21  |
| F07 | Hs.654566 | NM_002199    | <i>IRF2</i>    | 2.22  | 3.86  |
| F08 | Hs.515477 | NM_015649    | <i>IRF2BP1</i> | 0.05  | 15.31 |
| F09 | Hs.75254  | NM_001571    | <i>IRF3</i>    | 0.89  | 3.77  |
| F10 | Hs.401013 | NM_002460    | <i>IRF4</i>    | 0.46  | 3.13  |
| F11 | Hs.521181 | NM_001098629 | <i>IRF5</i>    | 1.43  | 6.53  |
| F12 | Hs.591415 | NM_006147    | <i>IRF6</i>    | 2.56  | 2.16  |
| G01 | Hs.166120 | NM_001572    | <i>IRF7</i>    | 18.56 | 12.51 |
| G02 | Hs.137427 | NM_002163    | <i>IRF8</i>    | 2.18  | 3.69  |
| G03 | Hs.519680 | NM_001145805 | <i>IRGM</i>    | N/A   | 4.78  |
| G04 | Hs.458485 | NM_005101    | <i>ISG15</i>   | 52.36 | 4.35  |
| G05 | Hs.705413 | NM_002303    | <i>LEPR</i>    | 5.25  | 3.19  |
| G06 | Hs.82906  | NM_005373    | <i>MPL</i>     | 0.18  | 7.76  |
| G07 | Hs.517307 | NM_002462    | <i>MX1</i>     | 11.26 | 4.66  |
| G08 | Hs.524760 | NM_002534    | <i>OAS1</i>    | 88.16 | 5.73  |
| G09 | Hs.75348  | NM_176783    | <i>PSME1</i>   | 0.79  | 2.93  |
| G10 | Hs.710248 | NM_152501    | <i>PYHIN1</i>  | N/A   | 4.54  |
| G11 | Hs.145150 | NM_004509    | <i>SP110</i>   | 6.59  | 6.31  |
| G12 | Hs.134602 | NM_003319    | <i>TTN</i>     | 0.14  | 2.51  |
| H01 | Hs.520640 | NM_001101    | <i>ACTB</i>    | 1.79  | 2.39  |
| H02 | Hs.534255 | NM_004048    | <i>B2M</i>     | 1.19  | 9.83  |
| H03 | Hs.592355 | NM_002046    | <i>GAPDH</i>   | 1     | 1     |
| H04 | Hs.412707 | NM_000194    | <i>HPRT1</i>   | 1.28  | 5.18  |
| H05 | Hs.546285 | NM_001002    | <i>RPLP0</i>   | 0.54  | 1.71  |

**Table S3. RT<sup>2</sup> Profiler™ PCR Array Data with IL29 treatment or HCV treatment, Related to Table 1**



| <i>Position</i> | <i>Unigene</i> | <i>GeneBank</i> | <i>Symbol</i>  | <i>Fold change<br/>(JAK inhibitor test)</i> |
|-----------------|----------------|-----------------|----------------|---------------------------------------------|
| A01             | Hs.12341       | NM_001111       | <i>ADAR</i>    | 0.89                                        |
| A02             | Hs.129966      | NM_001842       | <i>CNTFR</i>   | 14.96                                       |
| A03             | Hs.287729      | NM_001012288    | <i>CRLF2</i>   | 1.20                                        |
| A04             | Hs.520937      | NM_006140       | <i>CSF2RA</i>  | 1.34                                        |
| A05             | Hs.524517      | NM_000760       | <i>CSF3R</i>   | 1.51                                        |
| A06             | Hs.632586      | NM_001565       | <i>CXCL10</i>  | 6.01                                        |
| A07             | Hs.501452      | NM_005755       | <i>EBI3</i>    | 5.00                                        |
| A08             | Hs.62192       | NM_001993       | <i>F3</i>      | 1.32                                        |
| A09             | Hs.380250      | NM_005531       | <i>IFI16</i>   | 1.13                                        |
| A10             | Hs.532634      | NM_005532       | <i>IFI27</i>   | 2.27                                        |
| A11             | Hs.14623       | NM_006332       | <i>IFI30</i>   | 1.59                                        |
| A12             | Hs.632258      | NM_005533       | <i>IFI35</i>   | 0.76                                        |
| B01             | Hs.82316       | NM_006417       | <i>IFI44</i>   | 6.96                                        |
| B02             | Hs.389724      | NM_006820       | <i>IFI44L</i>  | 2.20                                        |
| B03             | Hs.730125      | NM_002038       | <i>IFI6</i>    | 1.59                                        |
| B04             | Hs.163173      | NM_022168       | <i>IFIH1</i>   | 2.17                                        |
| B05             | Hs.20315       | NM_001548       | <i>IFIT1</i>   | 1.41                                        |
| B06             | Hs.437609      | NM_001547       | <i>IFIT2</i>   | 6.66                                        |
| B07             | Hs.714337      | NM_001549       | <i>IFIT3</i>   | 12.18                                       |
| B08             | Hs.458414      | NM_003641       | <i>IFITM1</i>  | 8.29                                        |
| B09             | Hs.709321      | NM_006435       | <i>IFITM2</i>  | 10.60                                       |
| B10             | Hs.37026       | NM_024013       | <i>IFNA1</i>   | 8.86                                        |
| B11             | Hs.93907       | NM_002172       | <i>IFNA14</i>  | 5.85                                        |
| B12             | Hs.56303       | NM_002173       | <i>IFNA16</i>  | 3.20                                        |
| C01             | Hs.211575      | NM_000605       | <i>IFNA2</i>   | 5.23                                        |
| C02             | Hs.113211      | NM_002175       | <i>IFNA21</i>  | 1.83                                        |
| C03             | Hs.1510        | NM_021068       | <i>IFNA4</i>   | 3.23                                        |
| C04             | Hs.37113       | NM_002169       | <i>IFNA5</i>   | 1.10                                        |
| C05             | Hs.533470      | NM_021002       | <i>IFNA6</i>   | 1.07                                        |
| C06             | Hs.282274      | NM_021057       | <i>IFNA7</i>   | 2.88                                        |
| C07             | Hs.73890       | NM_002170       | <i>IFNA8</i>   | 4.97                                        |
| C08             | Hs.529400      | NM_000629       | <i>IFNAR1</i>  | 7.72                                        |
| C09             | Hs.708195      | NM_000874       | <i>IFNAR2</i>  | 1.94                                        |
| C10             | Hs.93177       | NM_002176       | <i>IFNB1</i>   | 2.96                                        |
| C11             | Hs.682604      | NM_176891       | <i>IFNE</i>    | 6.23                                        |
| C12             | Hs.856         | NM_000619       | <i>IFNG</i>    | 3.77                                        |
| D01             | Hs.520414      | NM_000416       | <i>IFNGR1</i>  | 1.27                                        |
| D02             | Hs.634632      | NM_005534       | <i>IFNGR2</i>  | 1.25                                        |
| D03             | Hs.591083      | NM_020124       | <i>IFNK</i>    | 2.34                                        |
| D04             | Hs.73010       | NM_002177       | <i>IFNW1</i>   | 1.17                                        |
| D05             | Hs.7879        | NM_001550       | <i>IFRD1</i>   | 1.35                                        |
| D06             | Hs.315177      | NM_006764       | <i>IFRD2</i>   | 2.51                                        |
| D07             | Hs.504035      | NM_001558       | <i>IL10RA</i>  | 5.56                                        |
| D08             | Hs.654593      | NM_000628       | <i>IL10RB</i>  | 1.25                                        |
| D09             | Hs.591088      | NM_004512       | <i>IL11RA</i>  | 1.18                                        |
| D10             | Hs.674         | NM_002187       | <i>IL12B</i>   | 1.58                                        |
| D11             | Hs.496646      | NM_001560       | <i>IL13RA1</i> | 1.74                                        |

|     |           |              |                |      |
|-----|-----------|--------------|----------------|------|
| D12 | Hs.654378 | NM_000585    | <i>IL15</i>    | 1.72 |
| E01 | Hs.445868 | NM_014432    | <i>IL20RA</i>  | 7.11 |
| E02 | Hs.61232  | NM_144717    | <i>IL20RB</i>  | 1.23 |
| E03 | Hs.210546 | NM_021798    | <i>IL21R</i>   | 5.12 |
| E04 | Hs.126891 | NM_052962    | <i>IL22RA2</i> | 5.78 |
| E05 | Hs.567792 | NM_172138    | <i>IL28A</i>   | 1.14 |
| E06 | Hs.221375 | NM_173065    | <i>IL28RA</i>  | 1.70 |
| E07 | Hs.406745 | NM_172140    | <i>IL29</i>    | 2.21 |
| E08 | Hs.474787 | NM_000878    | <i>IL2RB</i>   | 1.91 |
| E09 | Hs.84     | NM_000206    | <i>IL2RG</i>   | 1.20 |
| E10 | Hs.55378  | NM_139017    | <i>IL31RA</i>  | 5.86 |
| E11 | Hs.632790 | NM_002183    | <i>IL3RA</i>   | 3.24 |
| E12 | Hs.513457 | NM_000418    | <i>IL4R</i>    | 5.32 |
| F01 | Hs.68876  | NM_000564    | <i>IL5RA</i>   | 1.62 |
| F02 | Hs.654458 | NM_000600    | <i>IL6</i>     | 1.09 |
| F03 | Hs.709210 | NM_000565    | <i>IL6R</i>    | 1.08 |
| F04 | Hs.591742 | NM_002185    | <i>IL7R</i>    | 1.82 |
| F05 | Hs.406228 | NM_002186    | <i>IL9R</i>    | 1.14 |
| F06 | Hs.436061 | NM_002198    | <i>IRF1</i>    | 3.43 |
| F07 | Hs.654566 | NM_002199    | <i>IRF2</i>    | 1.67 |
| F08 | Hs.515477 | NM_015649    | <i>IRF2BP1</i> | 1.01 |
| F09 | Hs.75254  | NM_001571    | <i>IRF3</i>    | 1.18 |
| F10 | Hs.401013 | NM_002460    | <i>IRF4</i>    | 1.36 |
| F11 | Hs.521181 | NM_001098629 | <i>IRF5</i>    | 1.04 |
| F12 | Hs.591415 | NM_006147    | <i>IRF6</i>    | 2.29 |
| G01 | Hs.166120 | NM_001572    | <i>IRF7</i>    | 1.14 |
| G02 | Hs.137427 | NM_002163    | <i>IRF8</i>    | 1.93 |
| G03 | Hs.519680 | NM_001145805 | <i>IRGM</i>    | 2.76 |
| G04 | Hs.458485 | NM_005101    | <i>ISG15</i>   | 6.00 |
| G05 | Hs.705413 | NM_002303    | <i>LEPR</i>    | 1.16 |
| G06 | Hs.82906  | NM_005373    | <i>MPL</i>     | 1.71 |
| G07 | Hs.517307 | NM_002462    | <i>MX1</i>     | 1.82 |
| G08 | Hs.524760 | NM_002534    | <i>OAS1</i>    | 0.84 |
| G09 | Hs.75348  | NM_176783    | <i>PSME1</i>   | 0.88 |
| G10 | Hs.710248 | NM_152501    | <i>PYHIN1</i>  | 0.88 |
| G11 | Hs.145150 | NM_004509    | <i>SP110</i>   | 1.94 |
| G12 | Hs.134602 | NM_003319    | <i>TTN</i>     | 1.47 |
| H01 | Hs.520640 | NM_001101    | <i>ACTB</i>    | 1.22 |
| H02 | Hs.534255 | NM_004048    | <i>B2M</i>     | 9.37 |
| H03 | Hs.592355 | NM_002046    | <i>GAPDH</i>   | 1.03 |
| H04 | Hs.412707 | NM_000194    | <i>HPRT1</i>   | 0.87 |
| H05 | Hs.546285 | NM_001002    | <i>RPLP0</i>   | 0.91 |

**Table S4. RT<sup>2</sup> Profiler™ PCR Array Data with Jak/STAT Inhibitor treatment**
